# Supplementary material
Source: PubMed Central journal article supplement (PMC7110467)
Supplement: mmc1.pdf [file mmc1.pdf]

## Supplemental Data

### Structure of a Herpesvirus-Encoded

### Cysteine Protease Reveals

### a Unique Class of Deubiquitinating Enzymes

Christian Schlieker, Wilhelm A. Weihofen, Evelyne Frijns, Lisa M. Kattenhorn,

Rachelle Gaudet, and Hidde L. Ploegh

**Table S1: Structural homologs of the M48<sup>USP</sup>.** Z score, sequence identity of aligned region, rms deviations and alignment lengths were determined by using DALI structural alignment server. Total No. of residues gives the full length of the respective enzymes.

| Protein                                     | Origin                  | PDB code | Z score | Sequence identity of aligned region (%) | Rms deviation [Å] | Alignment length | Total No. of residues |
|---------------------------------------------|-------------------------|----------|---------|-----------------------------------------|-------------------|------------------|-----------------------|
| 1 Cysteine protease fragment (staphopain B) | <i>S. aureus</i>        | 1x9y     | 7.1     | 10                                      | 4.3               | 134              | 346                   |
| 2 mite fecal allergen der p 1 fragment      | <i>D. pteronyssinus</i> | 1xkg     | 6.0     | 9                                       | 3.9               | 124              | 298                   |
| 3 human procathepsin 1                      | <i>H. sapiens</i>       | 1cs8     | 6.0     | 9                                       | 4.0               | 121              | 316                   |
| 4 cysteine protease apg4b                   | <i>H. sapiens</i>       | 2cy7     | 5.3     | 12                                      | 4.4               | 142              | 333                   |
| 5 yeast bleomycin hydrolase                 | <i>S.cerevisiae</i>     | 3gcb     | 4.6     | 10                                      | 4.0               | 132              | 458                   |
| 6 protease core of mu calpain               | <i>R. norvegicus</i>    | 1kxr     | 4.3     | 9                                       | 3.9               | 118              | 320                   |
| 7 ubiquitin C-terminal hydrolase (USP 6)    | <i>S. cerevisiae</i>    | 1vjv     | 4.2     | 14                                      | 3.6               | 125              | 359                   |
| ...                                         |                         |          |         |                                         |                   |                  |                       |
| 12 ubiquitin C-terminal hydrolase (UCH-L 3) | <i>H. sapiens</i>       | 1uch     | 2.2     | 12                                      | 3.9               | 86               | 206                   |

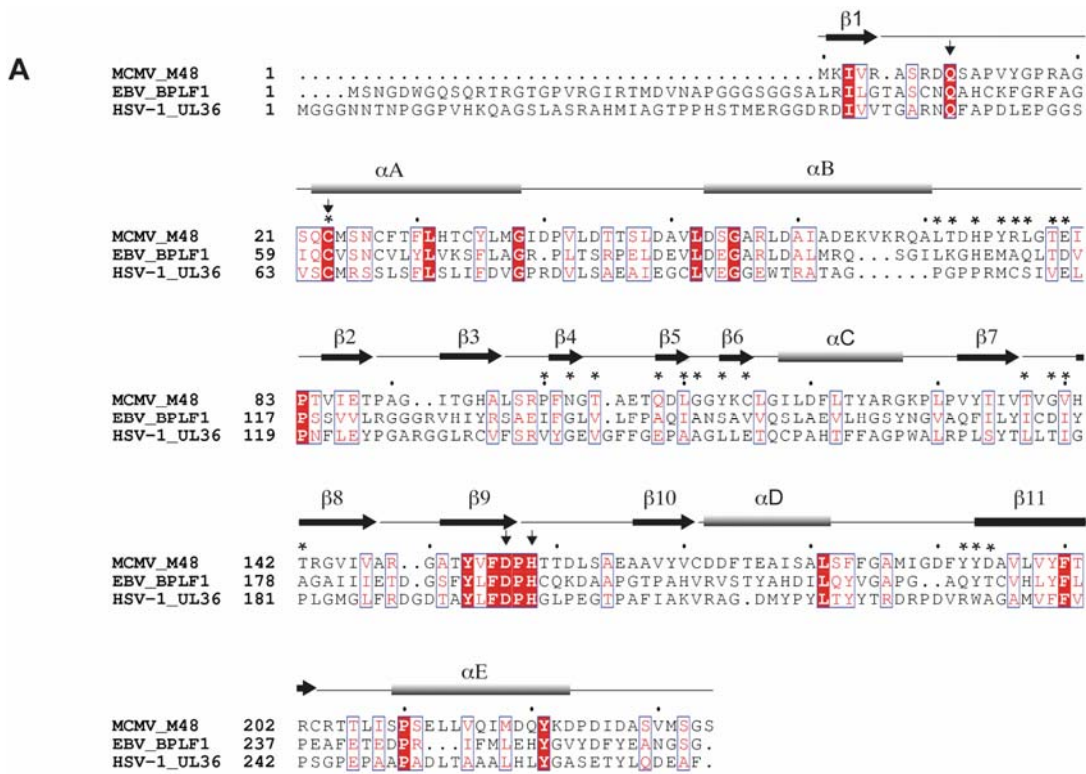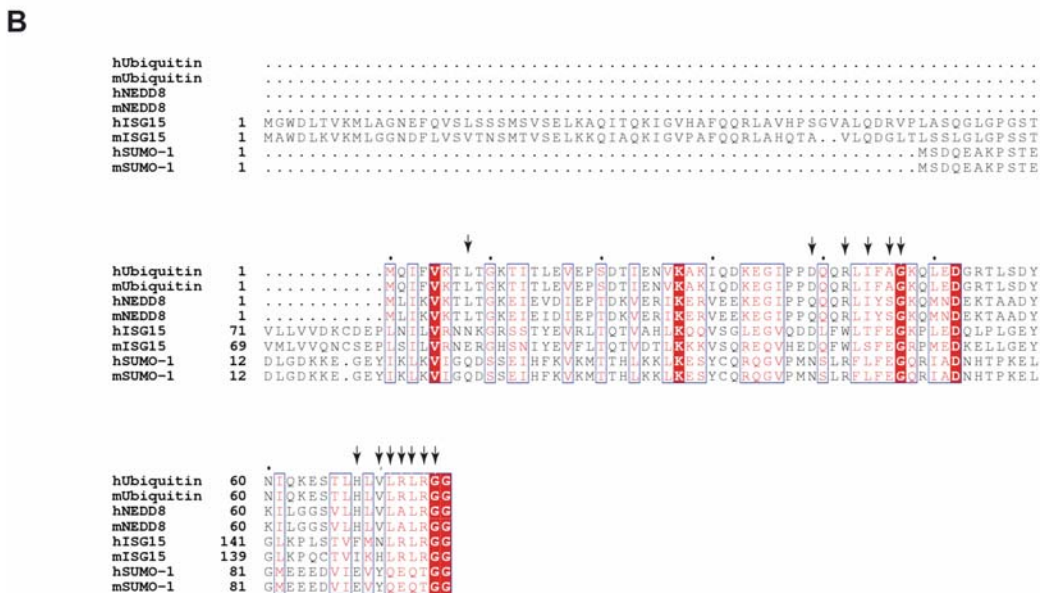

**Figure S1: Sequence alignments.** (A) Sequence alignment of the USP domains of M48<sup>USP</sup> (MCMV), BPLF1 (EBV) and UL36 (HSV-1). Active site residues are marked by vertical arrows and residues of M48<sup>USP</sup> contacting Ub are marked by stars. The secondary

structure, as observed in the M48<sup>USP</sup>-UbVME structure, is depicted above the sequences, with cylinders representing helices; arrows for  $\beta$ -strands and lines for coils. (B) Sequence alignment of Ub and Ub-like modifiers NEDD8, ISG15 and SUMO-1. h: *Homo sapiens*, m: *Mus musculus*. Ub residues that are contacted by M48<sup>USP</sup> are marked by arrows. Conserved residues are red on a white background; identical ones are white on red background.

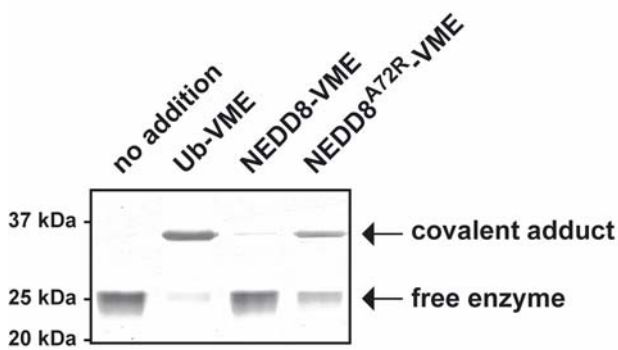

**Figure S2: A single Ala to Arg substitution is sufficient to convert NEDD8 into a M48USP substrate.** M48USP (2  $\mu$ M) was incubated for 90 min in absence or presence of a five-fold excess of the indicated suicide substrate or the corresponding mutant derivative, and applied to SDS-PAGE and silver staining. A shift in molecular mass is indicative of a productive interaction that leads to the formation of a covalent adduct.
